# Supplementary material
Source: publisher figshare collection journal article supplement (https://sage.figshare.com/ndownloader/files/17282459)
Supplement: Supplementary file 1 [file 17282459]

## Supplementary files

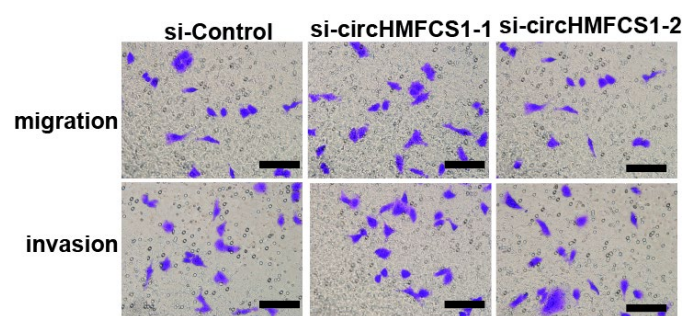

**Fig. S1.** Downregulation of circHMGCS1 do not inhibit metastasis abilities of CRC cells.
